# Supplementary material
Source: publisher figshare collection journal article supplement (https://acs.figshare.com/ndownloader/files/5196622)
Supplement: Supplementary file 1 [file 5196622]

  
data_egc01 
  
_audit_creation_method            SHELXL-97 
_chemical_name_systematic 
; 
 ? 
; 
_chemical_name_common             ? 
_chemical_melting_point           ? 
_chemical_formula_moiety          ? 
_chemical_formula_sum 
 'C13 H17 N O5 S' 
_chemical_formula_weight          299.34 
  
loop_ 
 _atom_type_symbol 
 _atom_type_description 
 _atom_type_scat_dispersion_real 
 _atom_type_scat_dispersion_imag 
 _atom_type_scat_source 
 'C'  'C'   0.0033   0.0016 
 'International Tables Vol C Tables 4.2.6.8 and 6.1.1.4' 
 'H'  'H'   0.0000   0.0000 
 'International Tables Vol C Tables 4.2.6.8 and 6.1.1.4' 
 'N'  'N'   0.0061   0.0033 
 'International Tables Vol C Tables 4.2.6.8 and 6.1.1.4' 
 'O'  'O'   0.0106   0.0060 
 'International Tables Vol C Tables 4.2.6.8 and 6.1.1.4' 
 'S'  'S'   0.1246   0.1234 
 'International Tables Vol C Tables 4.2.6.8 and 6.1.1.4' 
  
_symmetry_cell_setting            Orthorhombic 
_symmetry_space_group_name_H-M    P2(1)2(1)2(1) 
  
loop_ 
 _symmetry_equiv_pos_as_xyz 
 'x, y, z' 
 '-x+1/2, -y, z+1/2' 
 '-x, y+1/2, -z+1/2' 
 'x+1/2, -y+1/2, -z' 
  
_cell_length_a                    8.0871(4) 
_cell_length_b                    8.2042(4) 
_cell_length_c                    20.6350(10) 
_cell_angle_alpha                 90.00 
_cell_angle_beta                  90.00 
_cell_angle_gamma                 90.00 
_cell_volume                      1369.09(12) 
_cell_formula_units_Z             4 
_cell_measurement_temperature     100(2) 
_cell_measurement_reflns_used     21790 
_cell_measurement_theta_min       2.77 
_cell_measurement_theta_max       28.06 
  
_exptl_crystal_description        Prism 
_exptl_crystal_colour             Colorless 
_exptl_crystal_size_max           0.35 
_exptl_crystal_size_mid           0.31 
_exptl_crystal_size_min           0.26 
_exptl_crystal_density_meas       ? 
_exptl_crystal_density_diffrn     1.452 
_exptl_crystal_density_method     'not measured' 
_exptl_crystal_F_000              632 
_exptl_absorpt_coefficient_mu     0.255 
_exptl_absorpt_correction_type    none 
_exptl_absorpt_correction_T_min   0.9159 
_exptl_absorpt_correction_T_max   0.9366 
_exptl_absorpt_process_details    ? 
  
_exptl_special_details 
; 
 ? 
; 
  
_diffrn_ambient_temperature       100(2) 
_diffrn_radiation_wavelength      0.71073 
_diffrn_radiation_type            MoK\a 
_diffrn_radiation_source          'normal-focus sealed tube' 
_diffrn_radiation_monochromator   graphite 
_diffrn_measurement_device_type   'Bruker SMART 1000' 
_diffrn_measurement_method        '\w scans at 7 \f settings' 
_diffrn_detector_area_resol_mean  ? 
_diffrn_standards_number          ? 
_diffrn_standards_interval_count  ? 
_diffrn_standards_interval_time   ? 
_diffrn_standards_decay_%         ? 
_diffrn_reflns_number             27404 
_diffrn_reflns_av_R_equivalents   0.0507 
_diffrn_reflns_av_sigmaI/netI     0.0197 
_diffrn_reflns_limit_h_min        -10 
_diffrn_reflns_limit_h_max        10 
_diffrn_reflns_limit_k_min        -10 
_diffrn_reflns_limit_k_max        10 
_diffrn_reflns_limit_l_min        -26 
_diffrn_reflns_limit_l_max        26 
_diffrn_reflns_theta_min          1.97 
_diffrn_reflns_theta_max          28.28 
_reflns_number_total              3217 
_reflns_number_gt                 3121 
_reflns_threshold_expression      >2sigma(I) 
  
_computing_data_collection        'Bruker SMART v5.054' 
_computing_cell_refinement        'Bruker SAINT v6.022' 
_computing_data_reduction         'Bruker SAINT v6.022' 
_computing_structure_solution     'SHELXS-97 (Sheldrick, 1990)' 
_computing_structure_refinement   'SHELXL-97 (Sheldrick, 1997)' 
_computing_molecular_graphics     'Bruker SHELXTL' 
_computing_publication_material   'Bruker SHELXTL' 
  
_refine_special_details 
; 
 Refinement of F^2^ against ALL reflections.  The weighted R-factor wR and 
 goodness of fit S are based on F^2^, conventional R-factors R are based 
 on F, with F set to zero for negative F^2^. The threshold expression of 
 F^2^ > 2sigma(F^2^) is used only for calculating R-factors(gt) etc. and is 
 not relevant to the choice of reflections for refinement.  R-factors based 
 on F^2^ are statistically about twice as large as those based on F, and R- 
 factors based on ALL data will be even larger. 
; 
  
_refine_ls_structure_factor_coef  Fsqd 
_refine_ls_matrix_type            'Full matrix' 
_refine_ls_weighting_scheme       Sigma
_refine_ls_weighting_details      'w=1/s^2^(Fo^2^)' 
_atom_sites_solution_primary      'Direct methods'
_atom_sites_solution_secondary    'Difference Fourier map'
_atom_sites_solution_hydrogens    'Difference Fourier map'
_refine_ls_hydrogen_treatment     Unrestrained
_refine_ls_extinction_method      none 
_refine_ls_extinction_coef        ? 
_refine_ls_abs_structure_details 
 'Flack H D (1983), Acta Cryst. A39, 876-881' 
_refine_ls_abs_structure_Flack    0.02(5) 
_refine_ls_number_reflns          3217 
_refine_ls_number_parameters      249 
_refine_ls_number_restraints      0 
_refine_ls_R_factor_all           0.0298 
_refine_ls_R_factor_gt            0.0288 
_refine_ls_wR_factor_ref          0.0591 
_refine_ls_wR_factor_gt           0.0590 
_refine_ls_goodness_of_fit_ref    2.819 
_refine_ls_restrained_S_all       2.819 
_refine_ls_shift/su_max           0.001 
_refine_ls_shift/su_mean          0.000 
  
loop_ 
 _atom_site_label 
 _atom_site_type_symbol 
 _atom_site_fract_x 
 _atom_site_fract_y 
 _atom_site_fract_z 
 _atom_site_U_iso_or_equiv 
 _atom_site_adp_type 
 _atom_site_occupancy 
 _atom_site_symmetry_multiplicity 
 _atom_site_calc_flag 
 _atom_site_refinement_flags 
 _atom_site_disorder_assembly 
 _atom_site_disorder_group 
S S 1.15439(4) 0.24116(4) 0.892745(16) 0.01403(9) Uani 1 1 d . . . 
O1 O 0.60846(14) 0.28085(14) 0.67629(5) 0.0274(3) Uani 1 1 d . . . 
O2 O 0.69396(13) 0.36550(12) 0.77228(5) 0.0172(2) Uani 1 1 d . . . 
O3 O 0.93702(14) 0.04983(14) 0.74301(5) 0.0172(2) Uani 1 1 d . . . 
O4 O 1.30955(12) 0.26777(13) 0.86049(5) 0.0194(2) Uani 1 1 d . . . 
O5 O 1.12468(14) 0.09319(12) 0.92745(5) 0.0188(2) Uani 1 1 d . . . 
N N 1.01479(13) 0.25193(16) 0.83587(6) 0.0129(2) Uani 1 1 d . . . 
C1 C 0.64690(17) 0.24579(19) 0.73093(7) 0.0188(3) Uani 1 1 d . . . 
C2 C 0.71265(19) 0.31588(18) 0.84006(7) 0.0147(3) Uani 1 1 d . . . 
C3 C 0.7391(2) 0.46947(19) 0.87845(8) 0.0192(3) Uani 1 1 d . . . 
C4 C 0.84766(18) 0.18552(16) 0.84457(7) 0.0129(3) Uani 1 1 d . . . 
C5 C 0.81522(17) 0.04583(17) 0.79404(7) 0.0143(3) Uani 1 1 d . . . 
C6 C 0.8182(2) -0.12019(18) 0.82610(8) 0.0206(3) Uani 1 1 d . . . 
C7 C 0.6506(2) 0.07581(19) 0.75866(7) 0.0178(3) Uani 1 1 d . . . 
C8 C 1.12240(19) 0.40566(17) 0.94656(7) 0.0139(3) Uani 1 1 d . . . 
C9 C 1.1723(2) 0.56080(18) 0.92691(7) 0.0179(3) Uani 1 1 d . . . 
C10 C 1.1346(2) 0.69282(19) 0.96580(8) 0.0209(3) Uani 1 1 d . . . 
C11 C 1.0506(2) 0.6694(2) 1.02363(8) 0.0207(3) Uani 1 1 d . . . 
C12 C 1.0046(2) 0.5145(2) 1.04341(7) 0.0201(3) Uani 1 1 d . . . 
C13 C 1.03953(18) 0.38059(19) 1.00452(7) 0.0170(3) Uani 1 1 d . . . 
H H 1.028(2) 0.333(2) 0.8095(8) 0.020(4) Uiso 1 1 d . . . 
H2 H 0.6145(18) 0.2608(18) 0.8528(6) 0.003(3) Uiso 1 1 d . . . 
H3 H 1.026(3) 0.076(3) 0.7608(12) 0.057(8) Uiso 1 1 d . . . 
H4 H 0.840(2) 0.1386(19) 0.8868(8) 0.014(4) Uiso 1 1 d . . . 
H9 H 1.229(2) 0.576(2) 0.8871(8) 0.021(4) Uiso 1 1 d . . . 
H10 H 1.167(2) 0.799(2) 0.9538(7) 0.015(4) Uiso 1 1 d . . . 
H11 H 1.026(2) 0.756(2) 1.0465(8) 0.018(4) Uiso 1 1 d . . . 
H12 H 0.955(2) 0.496(2) 1.0841(9) 0.022(4) Uiso 1 1 d . . . 
H13 H 1.007(2) 0.278(2) 1.0170(8) 0.013(4) Uiso 1 1 d . . . 
H3A H 0.651(3) 0.538(2) 0.8720(8) 0.028(5) Uiso 1 1 d . . . 
H6A H 0.928(2) -0.132(2) 0.8440(9) 0.019(4) Uiso 1 1 d . . . 
H7A H 0.641(2) -0.001(2) 0.7222(8) 0.028(5) Uiso 1 1 d . . . 
H3B H 0.840(2) 0.521(2) 0.8689(8) 0.022(4) Uiso 1 1 d . . . 
H6B H 0.787(2) -0.198(2) 0.7948(8) 0.027(5) Uiso 1 1 d . . . 
H7B H 0.562(2) 0.062(2) 0.7896(8) 0.017(4) Uiso 1 1 d . . . 
H3C H 0.741(3) 0.439(2) 0.9259(9) 0.032(5) Uiso 1 1 d . . . 
H6C H 0.731(3) -0.128(2) 0.8608(8) 0.031(5) Uiso 1 1 d . . . 
  
loop_ 
 _atom_site_aniso_label 
 _atom_site_aniso_U_11 
 _atom_site_aniso_U_22 
 _atom_site_aniso_U_33 
 _atom_site_aniso_U_23 
 _atom_site_aniso_U_13 
 _atom_site_aniso_U_12 
S 0.01138(15) 0.01326(16) 0.01745(17) 0.00024(15) -0.00159(13) 0.00129(15) 
O1 0.0314(6) 0.0330(7) 0.0179(6) -0.0020(5) -0.0053(5) 0.0121(5) 
O2 0.0189(6) 0.0162(5) 0.0165(5) 0.0014(4) -0.0009(4) 0.0040(4) 
O3 0.0143(5) 0.0196(5) 0.0178(5) -0.0035(4) 0.0032(4) -0.0024(5) 
O4 0.0117(5) 0.0214(5) 0.0251(5) -0.0007(5) -0.0006(4) 0.0021(5) 
O5 0.0188(6) 0.0150(5) 0.0228(5) 0.0023(4) -0.0042(5) 0.0026(4) 
N 0.0120(5) 0.0127(6) 0.0140(6) 0.0012(5) -0.0008(4) -0.0013(5) 
C1 0.0140(6) 0.0226(7) 0.0198(7) -0.0029(6) 0.0001(6) 0.0054(7) 
C2 0.0119(7) 0.0170(7) 0.0152(7) 0.0001(6) 0.0002(6) 0.0007(6) 
C3 0.0167(8) 0.0181(8) 0.0229(9) -0.0034(6) -0.0026(6) 0.0058(7) 
C4 0.0115(7) 0.0129(6) 0.0143(7) 0.0016(5) 0.0009(6) -0.0015(6) 
C5 0.0117(7) 0.0150(7) 0.0161(7) -0.0010(5) 0.0023(6) 0.0001(6) 
C6 0.0254(9) 0.0144(7) 0.0222(8) -0.0019(6) 0.0034(7) -0.0016(7) 
C7 0.0146(7) 0.0195(7) 0.0193(8) -0.0052(6) -0.0010(7) -0.0017(6) 
C8 0.0130(7) 0.0131(7) 0.0155(7) -0.0006(5) -0.0023(6) 0.0007(6) 
C9 0.0173(8) 0.0180(7) 0.0184(7) 0.0024(6) -0.0008(6) -0.0038(6) 
C10 0.0211(8) 0.0150(7) 0.0266(8) 0.0015(6) -0.0036(7) -0.0035(6) 
C11 0.0184(8) 0.0192(8) 0.0246(8) -0.0085(7) -0.0032(6) 0.0004(6) 
C12 0.0158(8) 0.0297(9) 0.0149(8) -0.0016(6) -0.0008(6) -0.0036(7) 
C13 0.0153(8) 0.0178(8) 0.0179(7) 0.0021(6) -0.0030(6) -0.0038(6) 
  
_geom_special_details 
; 
 All esds (except the esd in the dihedral angle between two l.s. planes) 
 are estimated using the full covariance matrix.  The cell esds are taken 
 into account individually in the estimation of esds in distances, angles 
 and torsion angles; correlations between esds in cell parameters are only 
 used when they are defined by crystal symmetry.  An approximate (isotropic) 
 treatment of cell esds is used for estimating esds involving l.s. planes. 
; 
  
loop_ 
 _geom_bond_atom_site_label_1 
 _geom_bond_atom_site_label_2 
 _geom_bond_distance 
 _geom_bond_site_symmetry_2 
 _geom_bond_publ_flag 
S O5 1.4297(11) . ? 
S O4 1.4370(11) . ? 
S N 1.6308(12) . ? 
S C8 1.7667(14) . ? 
O1 C1 1.2044(17) . ? 
O2 C1 1.3555(18) . ? 
O2 C2 1.4644(18) . ? 
O3 C5 1.4423(17) . ? 
O3 H3 0.84(3) . ? 
N C4 1.4683(18) . ? 
N H 0.869(19) . ? 
C1 C7 1.508(2) . ? 
C2 C3 1.504(2) . ? 
C2 C4 1.531(2) . ? 
C2 H2 0.951(15) . ? 
C3 H3A 0.92(2) . ? 
C3 H3B 0.94(2) . ? 
C3 H3C 1.012(19) . ? 
C4 C5 1.5714(19) . ? 
C4 H4 0.955(16) . ? 
C5 C6 1.514(2) . ? 
C5 C7 1.538(2) . ? 
C6 H6A 0.97(2) . ? 
C6 H6B 0.942(19) . ? 
C6 H6C 1.008(19) . ? 
C7 H7A 0.982(18) . ? 
C7 H7B 0.968(17) . ? 
C8 C13 1.386(2) . ? 
C8 C9 1.395(2) . ? 
C9 C10 1.382(2) . ? 
C9 H9 0.949(18) . ? 
C10 C11 1.386(2) . ? 
C10 H10 0.945(17) . ? 
C11 C12 1.385(2) . ? 
C11 H11 0.878(18) . ? 
C12 C13 1.390(2) . ? 
C12 H12 0.942(18) . ? 
C13 H13 0.917(18) . ? 
  
loop_ 
 _geom_angle_atom_site_label_1 
 _geom_angle_atom_site_label_2 
 _geom_angle_atom_site_label_3 
 _geom_angle 
 _geom_angle_site_symmetry_1 
 _geom_angle_site_symmetry_3 
 _geom_angle_publ_flag 
O5 S O4 120.51(7) . . ? 
O5 S N 106.86(7) . . ? 
O4 S N 105.24(6) . . ? 
O5 S C8 108.01(6) . . ? 
O4 S C8 107.63(7) . . ? 
N S C8 108.03(7) . . ? 
C1 O2 C2 115.38(11) . . ? 
C5 O3 H3 105.9(18) . . ? 
C4 N S 121.95(10) . . ? 
C4 N H 118.6(12) . . ? 
S N H 113.8(12) . . ? 
O1 C1 O2 119.26(14) . . ? 
O1 C1 C7 125.54(14) . . ? 
O2 C1 C7 115.19(12) . . ? 
O2 C2 C3 106.55(12) . . ? 
O2 C2 C4 109.02(11) . . ? 
C3 C2 C4 116.87(13) . . ? 
O2 C2 H2 108.1(8) . . ? 
C3 C2 H2 111.8(9) . . ? 
C4 C2 H2 104.2(9) . . ? 
C2 C3 H3A 109.1(12) . . ? 
C2 C3 H3B 113.0(11) . . ? 
H3A C3 H3B 111.6(16) . . ? 
C2 C3 H3C 107.6(11) . . ? 
H3A C3 H3C 107.7(16) . . ? 
H3B C3 H3C 107.6(16) . . ? 
N C4 C2 112.94(12) . . ? 
N C4 C5 110.07(11) . . ? 
C2 C4 C5 110.49(12) . . ? 
N C4 H4 108.5(10) . . ? 
C2 C4 H4 107.1(10) . . ? 
C5 C4 H4 107.5(9) . . ? 
O3 C5 C6 109.18(12) . . ? 
O3 C5 C7 103.94(11) . . ? 
C6 C5 C7 111.40(13) . . ? 
O3 C5 C4 110.72(11) . . ? 
C6 C5 C4 111.32(11) . . ? 
C7 C5 C4 110.05(12) . . ? 
C5 C6 H6A 105.8(11) . . ? 
C5 C6 H6B 107.9(11) . . ? 
H6A C6 H6B 115.8(16) . . ? 
C5 C6 H6C 111.0(11) . . ? 
H6A C6 H6C 111.5(15) . . ? 
H6B C6 H6C 104.9(16) . . ? 
C1 C7 C5 110.21(12) . . ? 
C1 C7 H7A 107.4(10) . . ? 
C5 C7 H7A 109.3(11) . . ? 
C1 C7 H7B 110.0(10) . . ? 
C5 C7 H7B 108.1(10) . . ? 
H7A C7 H7B 111.8(15) . . ? 
C13 C8 C9 121.72(14) . . ? 
C13 C8 S 119.98(11) . . ? 
C9 C8 S 118.15(11) . . ? 
C10 C9 C8 118.83(14) . . ? 
C10 C9 H9 120.2(10) . . ? 
C8 C9 H9 121.0(10) . . ? 
C9 C10 C11 119.94(14) . . ? 
C9 C10 H10 120.8(10) . . ? 
C11 C10 H10 119.2(10) . . ? 
C12 C11 C10 120.82(15) . . ? 
C12 C11 H11 121.7(11) . . ? 
C10 C11 H11 117.5(11) . . ? 
C11 C12 C13 120.03(14) . . ? 
C11 C12 H12 121.5(11) . . ? 
C13 C12 H12 118.4(11) . . ? 
C8 C13 C12 118.63(14) . . ? 
C8 C13 H13 121.0(10) . . ? 
C12 C13 H13 120.3(10) . . ? 
  
loop_ 
 _geom_hbond_atom_site_label_D 
 _geom_hbond_atom_site_label_H 
 _geom_hbond_atom_site_label_A 
 _geom_hbond_distance_DH 
 _geom_hbond_distance_HA 
 _geom_hbond_distance_DA 
 _geom_hbond_angle_DHA 
 _geom_hbond_site_symmetry_A 
N H O3  0.869(19) 2.099(19) 2.9623(17) 172.3(16) 3_756 
O3 H3 N  0.84(3) 2.12(3) 2.6108(16) 117(2) . 
  
_diffrn_measured_fraction_theta_max    0.961 
_diffrn_reflns_theta_full              28.28 
_diffrn_measured_fraction_theta_full   0.961 
_refine_diff_density_max    0.449 
_refine_diff_density_min   -0.350 
_refine_diff_density_rms    0.049 
  
  
